# Supplementary material
Source: PubMed Central journal article supplement (PMC6292669)
Supplement: NIHMS995422-supplement-Sup_references.pdf [file NIHMS995422-supplement-Sup_references.pdf]

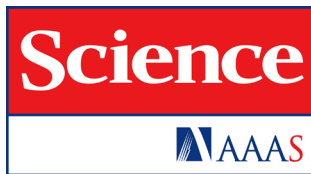

Supplementary Materials for  
**Glia as Architects of Central Nervous System Formation and Function**

Nicola J. Allen and David A. Lyons.

correspondence to: [nallen@salk.edu](mailto:nallen@salk.edu) or [david.lyons@ed.ac.uk](mailto:david.lyons@ed.ac.uk)

**This PDF file includes:**

Supplementary Reading List

## Supplementary Reading List

Here we provide further source material for interested readers. We supplement the citations in our core manuscript with additional topic-specific reviews and original research manuscripts, focusing on observations and conclusions described and outlined in the main manuscript for which we were not able to provide primary citations, due to space constraints. The supplementary reference list is structured to mirror the narrative of our piece. At the end, we include an extended list of references on the topic of glial cell diversity, which is an emerging area of intense investigation.

### Glia in CNS formation

#### *Glia are the principle regulators of cell number in the CNS*

##### *Radial glia (and derivatives) as progenitors*

1. S. C. Noctor, A. C. Flint, T. A. Weissman, R. S. Dammerman, A. R. Kriegstein, Neurons derived from radial glial cells establish radial units in neocortex. *Nature*. **409**, 714–720 (2001).
2. P. Malatesta, E. Hartfuss, M. Götz, Isolation of radial glial cells by fluorescent-activated cell sorting reveals a neuronal lineage. *Development*. **127**, 5253–5263 (2000).
3. D. V. Hansen, J. H. Lui, P. R. L. Parker, A. R. Kriegstein, Neurogenic radial glia in the outer subventricular zone of human neocortex. *Nature*. **464**, 554–561 (2010).
4. C. Guo *et al.*, Fezf2 Expression Identifies a Multipotent Progenitor for Neocortical Projection Neurons, Astrocytes, and Oligodendrocytes. *Neuron*. **80**, 1167–1174 (2013).
5. J. H. Lui *et al.*, Radial glia require PDGFD-PDGFR $\beta$  signalling in human but not mouse neocortex. *Nature*. **515**, 264–268 (2014).
6. P. Gao *et al.*, Deterministic progenitor behavior and unitary production of neurons in the neocortex. *Cell*. **159**, 775–788 (2014).
7. S. Furutachi *et al.*, Slowly dividing neural progenitors are an embryonic origin of adult neural stem cells. *Nat Neurosci*. **18**, 657–665 (2015).
8. J. T. Gonçalves, S. T. Schafer, F. H. Gage, Adult Neurogenesis in the Hippocampus: From Stem Cells to Behavior. *Cell*. **167**, 897–914 (2016).

9. R. Beattie, S. Hippenmeyer, Mechanisms of radial glia progenitor cell lineage progression. *FEBS Lett.* **591**, 3993–4008 (2017).
10. R. Beattie *et al.*, Mosaic Analysis with Double Markers Reveals Distinct Sequential Functions of Lgl1 in Neural Stem Cells. *Neuron.* **94**, 517–533.e3 (2017).

### ***Microglia in regulation of neuron number and neuronal clearance***

11. J. L. Marín-Teva *et al.*, Microglia promote the death of developing Purkinje cells. *Neuron.* **41**, 535–547 (2004).
12. A. Nimmerjahn, F. Kirchhoff, F. Helmchen, Resting microglial cells are highly dynamic surveillants of brain parenchyma in vivo. *Science.* **308**, 1314–1318 (2005).
13. S. Wakselman *et al.*, Developmental neuronal death in hippocampus requires the microglial CD11b integrin and DAP12 immunoreceptor. *Journal of Neuroscience.* **28**, 8138–8143 (2008).
14. M. Ueno *et al.*, Layer V cortical neurons require microglial support for survival during postnatal development. *Nat Neurosci.* **16**, 543–551 (2013).
15. L. Fourgeaud *et al.*, TAM receptors regulate multiple features of microglial physiology. *Nature.* **532**, 240–244 (2016).

### ***Neuronal regulation of glial cell number***

16. A. M. Casano, M. Albert, F. Peri, Developmental Apoptosis Mediates Entry and Positioning of Microglia in the Zebrafish Brain. *CellReports.* **16**, 897–906 (2016).
17. J. Xu, T. Wang, Y. Wu, W. Jin, Z. Wen, Microglia Colonization of Developing Zebrafish Midbrain Is Promoted by Apoptotic Neuron and Lysophosphatidylcholine. *DEVCEL.* **38**, 214–222 (2016).
18. E. M. Gibson *et al.*, Neuronal activity promotes oligodendrogenesis and adaptive myelination in the mammalian brain. *Science.* **344**, 1252304 (2014).

### ***Glia influence neuronal migration, axon specification and growth***

19. L. A. B. Elias, D. D. Wang, A. R. Kriegstein, Gap junction adhesion is necessary for radial migration in the neocortex. *Nature*. **448**, 901–907 (2007).
20. D. J. Solecki, Sticky situations: recent advances in control of cell adhesion during neuronal migration. *Current Opinion in Neurobiology*. **22**, 791–798 (2012).
21. S. Cappello *et al.*, A radial glia-specific role of RhoA in double cortex formation. *Neuron*. **73**, 911–924 (2012).
22. H. Higginbotham *et al.*, Arl13b-regulated cilia activities are essential for polarized radial glial scaffold formation. *Nature Neuroscience*. **16**, 1000–1007 (2013).
23. P. Squarzoni *et al.*, Microglia modulate wiring of the embryonic forebrain. *CellReports*. **8**, 1271–1279 (2014).
24. S. He, Z. Li, S. Ge, Y.-C. Yu, S.-H. Shi, Inside-Out Radial Migration Facilitates Lineage-Dependent Neocortical Microcircuit Assembly. *Neuron*. **86**, 1159–1166 (2015).
25. C. Ohtaka-Maruyama, H. Okado, Molecular Pathways Underlying Projection Neuron Production and Migration during Cerebral Cortical Development. *Front Neurosci*. **9**, 447 (2015).
26. T. J. Nowakowski, A. A. Pollen, C. Sandoval-Espinosa, A. R. Kriegstein, Transformation of the Radial Glia Scaffold Demarcates Two Stages of Human Cerebral Cortex Development. *Neuron*. **91**, 1219–1227 (2016).
27. S. W. Wallace, A. Singhvi, Y. Liang, Y. Lu, S. Shaham, PROS-1/Prospero Is a Major Regulator of the Glia-Specific Secretome Controlling Sensory-Neuron Shape and Function in *C. elegans*. *CellReports*. **15**, 550–562 (2016).
28. A. Singhvi *et al.*, A Glial K/Cl Transporter Controls Neuronal Receptive Ending Shape by Chloride Inhibition of an rGC. *Cell*. **165**, 936–948 (2016).
29. N. Kaneko, M. Sawada, K. Sawamoto, Mechanisms of neuronal migration in the adult brain. *Journal of Neurochemistry*. **141**, 835–847 (2017).
30. R. Bocchi *et al.*, Perturbed Wnt signaling leads to neuronal migration delay, altered interhemispheric connections and impaired social behavior. *Nature Communications*. **8**, 1158 (2017).
31. K. Kridsada *et al.*, Roof Plate-Derived Radial Glial-like Cells Support Developmental Growth of Rapidly Adapting Mechanoreceptor Ascending Axons. *CellReports*. **23**, 2928–2941 (2018).

## ***Glia regulate synapse formation and pruning***

### ***Astrocytes***

32. E. M. Ullian, S. K. Sapperstein, K. S. Christopherson, B. A. Barres, Control of synapse number by glia. *Science*. **291**, 657–661 (2001).
33. H. Hama, C. Hara, K. Yamaguchi, A. Miyawaki, PKC signaling mediates global enhancement of excitatory synaptogenesis in neurons triggered by local contact with astrocytes. *Neuron*. **41**, 405–415 (2004).
34. A. J. Barker, S. M. Koch, J. Reed, B. A. Barres, E. M. Ullian, Developmental control of synaptic receptivity. *Journal of Neuroscience*. **28**, 8150–8160 (2008).
35. K. S. Christopherson *et al.*, Thrombospondins are astrocyte-secreted proteins that promote CNS synaptogenesis. *Cell*. **120**, 421–433 (2005).
36. H. Kucukdereli *et al.*, Control of excitatory CNS synaptogenesis by astrocyte-secreted proteins Hevin and SPARC. *PNAS*. **108**, E440–9 (2011).
37. E. V. Jones *et al.*, Astrocytes control glutamate receptor levels at developing synapses through SPARC-beta-integrin interactions. *Journal of Neuroscience*. **31**, 4154–4165 (2011).
38. N. J. Allen *et al.*, Astrocyte glypicans 4 and 6 promote formation of excitatory synapses via GluA1 AMPA receptors. *Nature*. **486**, 410–414 (2012).
39. W.-S. Chung *et al.*, Astrocytes mediate synapse elimination through MEGF10 and MERTK pathways. *Nature*. **504**, 394–400 (2013).
40. S. K. Singh *et al.*, Astrocytes Assemble Thalamocortical Synapses by Bridging NRX1a and NL1 via Hevin. *Cell*. **164**, 183–196 (2016).
41. A. E. J. Hillen, J. P. H. Burbach, E. M. Hol, Cell adhesion and matricellular support by astrocytes of the tripartite synapse. *Progress in neurobiology* (2018), doi:10.1016/j.pneurobio.2018.02.002.

### ***Microglia***

42. D. P. Schafer *et al.*, Microglia Sculpt Postnatal Neural Circuits in an Activity and Complement-Dependent Manner. *Neuron*. **74**, 691–705 (2012).
43. A. Miyamoto *et al.*, Microglia contact induces synapse formation in developing somatosensory cortex. *Nature Communications*. **7**, 12540 (2016).
44. T. L. Tay, J. C. Savage, C. W. Hui, K. Bisht, M.-È. Tremblay, Microglia across the lifespan: from origin to function in brain development, plasticity and cognition. *The Journal of Physiology*. **595**, 1929–1945 (2017).

45. A. Vilalta, G. C. Brown, Neurophagy, the phagocytosis of live neurons and synapses by glia, contributes to brain development and disease. *FEBS J.* **79**, 619 (2017).
46. L. Weinhard *et al.*, Microglia remodel synapses by presynaptic trogocytosis and spine head filopodia induction. *Nature Communications.* **9**, 1228 (2018).

### ***Human glia and synapse regulation***

47. N. A. Oberheim, X. Wang, S. Goldman, M. Nedergaard, Astrocytic complexity distinguishes the human brain. *Trends in Neurosciences.* **29**, 547–553 (2006).
48. N. A. Oberheim *et al.*, Uniquely hominid features of adult human astrocytes. *Journal of Neuroscience.* **29**, 3276–3287 (2009).
49. X. Han *et al.*, Forebrain engraftment by human glial progenitor cells enhances synaptic plasticity and learning in adult mice. *Cell Stem Cell.* **12**, 342–353 (2013).
50. S. A. Goldman, M. Nedergaard, M. S. Windrem, Modeling cognition and disease using human glial chimeric mice. *Glia.* **63**, 1483–1493 (2015).
51. M. S. Windrem *et al.*, Human iPSC Glial Mouse Chimeras Reveal Glial Contributions to Schizophrenia. *Cell Stem Cell.* **21**, 195–208.e6 (2017).

### **Glia in regulating CNS function**

#### **Glia adjust synaptic communication and plasticity**

##### ***Glutamate transporters***

52. K. Tanaka *et al.*, Epilepsy and exacerbation of brain injury in mice lacking the glutamate transporter GLT-1. *Science.* **276**, 1699–1702 (1997).
53. Y. Yang *et al.*, Presynaptic regulation of astroglial excitatory neurotransmitter transporter GLT1. *Neuron.* **61**, 880–894 (2009).
54. A. M. Benediktsson *et al.*, Neuronal activity regulates glutamate transporter dynamics in developing astrocytes. *Glia.* **60**, 175–188 (2011).
55. N. J. Allen, Astrocyte regulation of synaptic behavior. *Annu. Rev. Cell Dev. Biol.* **30**, 439–463 (2014).

### ***Activity and ensheathment of synapses by astrocyte processes***

56. C. Genoud *et al.*, Plasticity of astrocytic coverage and glutamate transporter expression in adult mouse cortex. *Plos Biol.* **4**, e343 (2006).
57. Y. Bernardinelli *et al.*, Activity-dependent structural plasticity of perisynaptic astrocytic domains promotes excitatory synapse stability. *Curr. Biol.* **24**, 1679–1688 (2014).
58. J. Hirrlinger, S. Hülsmann, F. Kirchhoff, Astroglial processes show spontaneous motility at active synaptic terminals in situ. *Eur. J. Neurosci.* **20**, 2235–2239 (2004).

### ***Astrocytes receptors for multiple neurotransmitters and neuromodulators***

59. A. H. Cornell-Bell, S. M. Finkbeiner, M. S. Cooper, S. J. Smith, Glutamate induces calcium waves in cultured astrocytes: long-range glial signaling. *Science.* **247**, 470–473 (1990).
60. J. T. Porter, K. D. McCarthy, Hippocampal astrocytes in situ respond to glutamate released from synaptic terminals. *J. Neurosci.* **16**, 5073–5081 (1996).
61. G. Perea, A. Araque, Properties of synaptically evoked astrocyte calcium signal reveal synaptic information processing by astrocytes. *Journal of Neuroscience.* **25**, 2192–2203 (2005).
62. B. S. Khakh, K. D. McCarthy, Astrocyte calcium signaling: from observations to functions and the challenges therein. *Cold Spring Harbor Perspectives in Biology.* **7**, a020404 (2015).

### ***Gliotransmitters and neuroplasticity***

63. M. J. Schell, M. E. Molliver, S. H. Snyder, D-serine, an endogenous synaptic modulator: localization to astrocytes and glutamate-stimulated release. *Proceedings of the National Academy of Sciences of the United States of America.* **92**, 3948–3952 (1995).
64. A. Araque, V. Parpura, R. P. Sanzgiri, P. G. Haydon, Tripartite synapses: glia, the unacknowledged partner. *Trends in Neurosciences.* **22**, 208–215 (1999).
65. A. Araque *et al.*, Gliotransmitters travel in time and space. *Neuron.* **81**, 728–739 (2014).
66. P. B. Guthrie *et al.*, ATP released from astrocytes mediates glial calcium waves. *J. Neurosci.* **19**, 520–528 (1999).
67. O. Pascual *et al.*, Astrocytic purinergic signaling coordinates synaptic networks.

*Science*. **310**, 113–116 (2005).

68. C. Henneberger, T. Papouin, S. H. R. Oliet, D. A. Rusakov, Long-term potentiation depends on release of D-serine from astrocytes. *Nature*. **463**, 232–236 (2010).
69. M. Martin-Fernandez *et al.*, Synapse-specific astrocyte gating of amygdala-related behavior. *Nature Neuroscience*. **20**, 1540–1548 (2017).

#### ***OPCs and microglia and synaptic function***

70. C. N. Parkhurst *et al.*, Microglia promote learning-dependent synapse formation through brain-derived neurotrophic factor. *Cell*. **155**, 1596–1609 (2013).
71. M. R. P. Elmore *et al.*, Colony-stimulating factor 1 receptor signaling is necessary for microglia viability, unmasking a microglia progenitor cell in the adult brain. *Neuron*. **82**, 380–397 (2014).
72. D. Sakry *et al.*, Oligodendrocyte Precursor Cells Modulate the Neuronal Network by Activity-Dependent Ectodomain Cleavage of Glial NG2. *Plos Biol*. **12**, e1001993 (2014).
73. G. O. Sipe *et al.*, Microglial P2Y<sub>12</sub> is necessary for synaptic plasticity in mouse visual cortex. *Nature Communications*. **7**, 10905 (2016).
74. E. M. York, L.-P. Bernier, B. A. Macvicar, Microglial modulation of neuronal activity in the healthy brain. *Dev Neurobiol*. **78**, 593–603 (2018).

#### ***Glial regulation of ion homeostasis affects circuit function***

75. S. W. Kuffler, Neuroglial cells: physiological properties and a potassium mediated effect of neuronal activity on the glial membrane potential. *Proc. R. Soc. Lond., B, Biol. Sci.* **168**, 1–21 (1967).
76. M. L. Olsen *et al.*, New Insights on Astrocyte Ion Channels: Critical for Homeostasis and Neuron-Glia Signaling. *Journal of Neuroscience*. **35**, 13827–13835 (2015).
77. B. Djukic, K. B. Casper, B. D. Philpot, L.-S. Chin, K. D. McCarthy, Conditional knock-out of Kir4.1 leads to glial membrane depolarization, inhibition of potassium and glutamate uptake, and enhanced short-term synaptic potentiation. *Journal of Neuroscience*. **27**, 11354–11365 (2007).



## Neuro-glia-vascular coupling provides metabolic support

78. A.-L. F. van Deijk *et al.*, Astrocyte lipid metabolism is critical for synapse development and function in vivo. *Glia*. **65**, 670–682 (2017).
79. D. H. Mauch *et al.*, CNS synaptogenesis promoted by glia-derived cholesterol. *Science*. **294**, 1354–1357 (2001).
80. L. Pellerin, P. J. Magistretti, Glutamate uptake into astrocytes stimulates aerobic glycolysis: a mechanism coupling neuronal activity to glucose utilization. *Proceedings of the National Academy of Sciences of the United States of America*. **91**, 10625–10629 (1994).
81. L. Pellerin, P. J. Magistretti, Sweet sixteen for ANLS. *Journal of Cerebral Blood Flow & Metabolism*. **32**, 1152–1166 (2012).
82. C. N. Hall, M. C. Klein-Flügge, C. Howarth, D. Attwell, Oxidative phosphorylation, not glycolysis, powers presynaptic and postsynaptic mechanisms underlying brain information processing. *Journal of Neuroscience*. **32**, 8940–8951 (2012).
83. A. I. Ivanov *et al.*, Glycolysis and oxidative phosphorylation in neurons and astrocytes during network activity in hippocampal slices. *Journal of Cerebral Blood Flow & Metabolism*. **34**, 397–407 (2014).
84. A. Suzuki *et al.*, Astrocyte-Neuron Lactate Transport Is Required for Long-Term Memory Formation. *Cell*. **144**, 810–823 (2011).
85. Y. Lee *et al.*, Oligodendroglia metabolically support axons and contribute to neurodegeneration. *Nature*. **487**, 443–448 (2012).
86. U. Fünfschilling *et al.*, Glycolytic oligodendrocytes maintain myelin and long-term axonal integrity. *Nature*. **485**, 517–521 (2012).
87. A. S. Saab *et al.*, Oligodendroglial NMDA Receptors Regulate Glucose Import and Axonal Energy Metabolism. *Neuron*. **91**, 119–132 (2016).
88. A. Trevisiol *et al.*, Monitoring ATP dynamics in electrically active white matter tracts. *Elife*. **6**, 27 (2017).

## Glia regulate network level function

### *Astrocytes dynamically alter brain states*

89. M. M. Halassa *et al.*, Astrocytic modulation of sleep homeostasis and cognitive consequences of sleep loss. *Neuron*. **61**, 213–219 (2009).

90. T. Sasaki *et al.*, Application of an optogenetic byway for perturbing neuronal activity via glial photostimulation. *PNAS*. **109**, 20720–20725 (2012).
91. M. Paukert *et al.*, Norepinephrine Controls Astroglial Responsiveness to Local Circuit Activity. *Neuron*. **82**, 1263–1270 (2014).
92. Z. Ma, T. Stork, D. E. Bergles, M. R. Freeman, Neuromodulators signal through astrocytes to alter neural circuit activity and behaviour. *Nature Neuroscience*. **539**, 428–432 (2016).
93. K. E. Poskanzer, R. Yuste, Astrocytes regulate cortical state switching in vivo. *PNAS*. **113**, E2675–84 (2016).
94. P. G. Haydon, Astrocytes and the modulation of sleep. *Current Opinion in Neurobiology*. **44**, 28–33 (2017).

***Myelination dynamically alters circuit function***  
***Reviews on myelin plasticity/ adaptive myelination***

95. R. D. Fields, A new mechanism of nervous system plasticity: activity-dependent myelination. *Nature Neuroscience*. **16**, 756–767 (2015).
96. C. W. Mount, M. Monje, Wrapped to Adapt: Experience-Dependent Myelination. *Neuron*. **95**, 743–756 (2017).
97. C. Sampaio-Baptista, H. Johansen-Berg, White Matter Plasticity in the Adult Brain. *Neuron*. **96**, 1239–1251 (2017).

***Neuronal activity regulates oligodendrocyte development and myelination in vivo***

98. C. Demerens *et al.*, Induction of myelination in the central nervous system by electrical activity. *Proceedings of the National Academy of Sciences of the United States of America*. **93**, 9887–9892 (1996).
18. E. M. Gibson *et al.*, Neuronal activity promotes oligodendrogenesis and adaptive myelination in the mammalian brain. *Science*. **344**, 1252304 (2014).
99. J. H. Hines, A. M. Ravanelli, R. Schwandt, E. K. Scott, B. Appel, Neuronal activity biases axon selection for myelination in vivo. *Nat Neurosci*. **18**, 683–689 (2015).
100. S. Mensch *et al.*, Synaptic vesicle release regulates myelin sheath number of individual oligodendrocytes in vivo. *Nat Neurosci*. **18**, 628–630 (2015).
101. S. Koudelka *et al.*, Individual Neuronal Subtypes Exhibit Diversity in CNS

Myelination Mediated by Synaptic Vesicle Release. *Curr. Biol.* **26**, 1447–1455 (2016).

102. E. Kougioumtzidou *et al.*, Signalling through AMPA receptors on oligodendrocyte precursors promotes myelination by enhancing oligodendrocyte survival. *Elife.* **6**, e28080 (2017).
103. S. Mitew *et al.*, Pharmacogenetic stimulation of neuronal activity increases myelination in an axon-specific manner. *Nature Communications.* **9**, 306 (2018).

### ***Oligodendrocytes, myelin and circuit function***

104. M. Makinodan, K. M. Rosen, S. Ito, G. Corfas, A Critical Period for Social Experience-Dependent Oligodendrocyte Maturation and Myelination. *Science.* **337**, 1357–1360 (2012).
105. J. Liu *et al.*, Impaired adult myelination in the prefrontal cortex of socially isolated mice. *Nat Neurosci.* **15**, 1621–1623 (2012).
106. I. A. McKenzie *et al.*, Motor skill learning requires active central myelination. *Science.* **346**, 318–322 (2014).
107. M. C. Ford *et al.*, Tuning of Ranvier node and internode properties in myelinated axons to adjust action potential timing. *Nature Communications.* **6**, 8073 (2015).
108. J. Liu *et al.*, Clemastine Enhances Myelination in the Prefrontal Cortex and Rescues Behavioral Changes in Socially Isolated Mice. *Journal of Neuroscience.* **36**, 957–962 (2016).
109. L. Xiao *et al.*, Rapid production of new oligodendrocytes is required in the earliest stages of motor-skill learning. *Nat Neurosci.* **19**, 1210–1217 (2016).
110. I. L. Arancibia-Carcamo *et al.*, Node of Ranvier length as a potential regulator of myelinated axon conduction speed. *Elife.* **6**, 521 (2017).

### **Glial diversity**

#### ***Sequence based diversity***

111. J. D. Cahoy *et al.*, A transcriptome database for astrocytes, neurons, and oligodendrocytes: a new resource for understanding brain development and function. *Journal of Neuroscience.* **28**, 264–278 (2008).
112. J. P. Doyle *et al.*, Application of a translational profiling approach for the comparative analysis of CNS cell types. *Cell.* **135**, 749–762 (2008).

113. Y. Zhang *et al.*, An RNA-sequencing transcriptome and splicing database of glia, neurons, and vascular cells of the cerebral cortex. *Journal of Neuroscience*. **34**, 11929–11947 (2014).
114. S. Marques *et al.*, Oligodendrocyte heterogeneity in the mouse juvenile and adult central nervous system. *Science*. **352**, 1326–1329 (2016).
115. J. García-Marqués, L. López-Mascaraque, Clonal Identity Determines Astrocyte Cortical Heterogeneity. *Cerebral Cortex*. **23**, 1463–1472 (2012).
116. S. Darmanis *et al.*, A survey of human brain transcriptome diversity at the single cell level. *PNAS*. **112**, 7285–7290 (2015).
117. A. Zeisel *et al.*, Brain structure. Cell types in the mouse cortex and hippocampus revealed by single-cell RNA-seq. *Science*. **347**, 1138–1142 (2015).
118. Y. Zhang *et al.*, Purification and Characterization of Progenitor and Mature Human Astrocytes Reveals Transcriptional and Functional Differences with Mouse. *Neuron*. **89**, 37–53 (2016).
119. A. S. Buosi, I. Matias, A. P. B. Araujo, C. Batista, F. C. A. Gomes, Heterogeneity in Synaptogenic Profile of Astrocytes from Different Brain Regions. *Mol Neurobiol*. **55**, 751–762 (2018).
120. H. Chai *et al.*, Neural Circuit-Specialized Astrocytes: Transcriptomic, Proteomic, Morphological, and Functional Evidence. *Neuron*. **95**, 531–549.e9 (2017).
121. L. Morel *et al.*, Molecular and Functional Properties of Regional Astrocytes in the Adult Brain. *Journal of Neuroscience*. **37**, 8706–8717 (2017).
122. A. A. Pollen *et al.*, Molecular identity of human outer radial glia during cortical development. *Cell*. **163**, 55–67 (2015).
123. T. J. Nowakowski *et al.*, Spatiotemporal gene expression trajectories reveal developmental hierarchies of the human cortex. *Science*. **358**, 1318–1323 (2017).
124. M. Florio *et al.*, Evolution and cell-type specificity of human-specific genes preferentially expressed in progenitors of fetal neocortex. *Elife*. **7**, e32332 (2018).
125. M. B. Johnson *et al.*, Single-cell analysis reveals transcriptional heterogeneity of neural progenitors in human cortex. *Nat Neurosci*. **18**, 637–646 (2015).

***Anatomical, regional and functional diversity***

126. G. S. Tomassy *et al.*, Distinct profiles of myelin distribution along single axons of pyramidal neurons in the neocortex. *Science*. **344**, 319–324 (2014).

127. G. S. Tomassy, L. B. Dershowitz, P. Arlotta, Diversity Matters: A Revised Guide to Myelination. *Trends in Cell Biology*. **26**, 135–147 (2016).
128. K. D. Micheva *et al.*, A large fraction of neocortical myelin ensheathes axons of local inhibitory neurons. *Elife*. **5** (2016), doi:10.7554/eLife.15784.
129. J. Stedehouder *et al.*, Fast-spiking Parvalbumin Interneurons are Frequently Myelinated in the Cerebral Cortex of Mice and Humans. *Cerebral Cortex*, 1–13 (2017).
130. H. H. Tsai *et al.*, Regional Astrocyte Allocation Regulates CNS Synaptogenesis and Repair. *Science* (2012), doi:10.1126/science.1222381.
131. A. V. Molofsky *et al.*, Astrocyte-encoded positional cues maintain sensorimotor circuit integrity. *Nature*. **509**, 189–194 (2014).
132. K. Grabert *et al.*, Microglial brain region–dependent diversity and selective regional sensitivities to aging. *Nature Neuroscience*. **19**, 504–516 (2016).
133. D. Lanjakornsiripan *et al.*, Layer-specific morphological and molecular differences in neocortical astrocytes and their dependence on neuronal layers. *Nature Communications*. **9**, 1623 (2018).
134. M. S. Thion *et al.*, Microbiome Influences Prenatal and Adult Microglia in a Sex-Specific Manner. *Cell*. **172**, 500–516.e16 (2018).

### ***Extrinsic regulation of glial diversity***

135. W. T. Farmer, K. Murai, Resolving Astrocyte Heterogeneity in the CNS. *Front Cell Neurosci*. **11**, 1420.e5–7 (2017).
136. K. E. Poskanzer, A. V. Molofsky, Dynamism of an Astrocyte In Vivo: Perspectives on Identity and Function. *Annu. Rev. Physiol*. **80**, 143–157 (2018).
137. S. A. Wolf, H. W. G. M. Boddeke, H. Kettenmann, Microglia in Physiology and Disease. *Annu. Rev. Physiol*. **79**, 619–643 (2017).
138. M. E. Bechler, L. Byrne, C. French-Constant, CNS Myelin Sheath Lengths Are an Intrinsic Property of Oligodendrocytes. *Curr. Biol*. **25**, 2411–2416 (2015).
139. B. S. Khakh, M. V. Sofroniew, Diversity of astrocyte functions and phenotypes in neural circuits. *Nat Neurosci*. **18**, 942–952 (2015).
140. C.-C. John Lin *et al.*, Identification of diverse astrocyte populations and their malignant analogs. *Nat Neurosci*. **20**, 396–405 (2017).
141. J. A. Stogsdill *et al.*, Astrocytic neuroligins control astrocyte morphogenesis and synaptogenesis. *Nature*. **551**, 192–197 (2017).

142. W. T. Farmer *et al.*, Neurons diversify astrocytes in the adult brain through sonic hedgehog signaling. *Science*. **351**, 849–854 (2016).
143. T. Stork, A. Sheehan, O. E. Tasdemir-Yilmaz, M. R. Freeman, Neuron-glia interactions through the Heartless FGF receptor signaling pathway mediate morphogenesis of *Drosophila* astrocytes. *Neuron*. **83**, 388–403 (2014).
144. A. K. Muthukumar, T. Stork, M. R. Freeman, Activity-dependent regulation of astrocyte GAT levels during synaptogenesis. *Nat Neurosci*. **17**, 1340–1350 (2014).
145. L. Morel, H. Higashimori, M. Tolman, Y. Yang, VGluT1+ neuronal glutamatergic signaling regulates postnatal developmental maturation of cortical protoplasmic astroglia. *Journal of Neuroscience*. **34**, 10950–10962 (2014).
146. R. G. Almeida, T. Czopka, C. ffrench-Constant, D. A. Lyons, Individual axons regulate the myelinating potential of single oligodendrocytes in vivo. *Development*. **138**, 4443–4450 (2011).
147. L. M. De Biase *et al.*, Local Cues Establish and Maintain Region-Specific Phenotypes of Basal Ganglia Microglia. *Neuron*. **95**, 341–356.e6 (2017).
